# Supplementary material for: Mutagenesis and immunological evaluation of group A streptococcal C5a peptidase as an antigen for vaccine development and as a carrier protein for glycoconjugate vaccine design
Source: Royal Society of Chemistry journal article supplement (doi:10.1039/c7ra07923k), 2017-01-01
Supplement: c7ra07923k1.pdf [file c7ra07923k1.pdf]

## Supporting Information for

### Mutagenesis and immunological evaluation of group A streptococcal C5a peptidase as an antigen for vaccine development and as a carrier protein for glycoconjugate vaccine design

Hui Li,<sup>a</sup> Subo Wang,<sup>a</sup> Yisheng Zhao,<sup>a</sup> Zonggang Chen,<sup>a</sup> Guofeng Gu,<sup>a,\*</sup> and Zhongwu Guo<sup>a,b,\*</sup>

<sup>a</sup> National Glycoengineering Research Center, School of Life Science, Shandong University, 27 Shanda Nan Lu, Jinan 250100, China

<sup>b</sup> Department of Chemistry, University of Florida, 214 Leigh Hall, Gainesville, Florida 32611, United States

\*Corresponding authors. Tel: +86 (531) 88363612, +1 (352) 392 9133; E-mail: [guofenggu@sdu.edu.cn](mailto:guofenggu@sdu.edu.cn), [zguo@chem.ufl.edu](mailto:zguo@chem.ufl.edu)

#### Table of content

|                                                                                                                                                  |           |
|--------------------------------------------------------------------------------------------------------------------------------------------------|-----------|
| I. The primers designed for site-directed mutagenesis.....                                                                                       | Page S2   |
| II. MS results for the hydrolysis of human C5a peptide by various $\Delta$ ScpA.....                                                             | Page S3   |
| <b>Figure S1.</b> The results for wild-type $\Delta$ ScpA.....                                                                                   | Page S3   |
| <b>Figure S2.</b> The results for $\Delta$ ScpA <sup>D130A</sup> .....                                                                           | Page S3   |
| <b>Figure S3.</b> The results for $\Delta$ ScpA <sup>N295A</sup> .....                                                                           | Page S4   |
| <b>Figure S4.</b> The results for $\Delta$ ScpA <sup>S512A</sup> .....                                                                           | Page S4   |
| <b>Figure S5.</b> The results for $\Delta$ ScpA <sup>D130A,S512A</sup> .....                                                                     | Page S5   |
| <b>Figure S6.</b> The results for $\Delta$ ScpA <sup>H193A</sup> .....                                                                           | Page S5   |
| III. Characterization of GAS trisaccharide hapten <b>1</b> .....                                                                                 | Page S6   |
| <b>Figure S7.</b> <sup>1</sup> H, <sup>13</sup> C, and HRMS spectra of GAS trisaccharide <b>1</b> .....                                          | Page S6-7 |
| IV. Preparation and characterization of the GAS trisaccharide-protein conjugates.....                                                            | Page S8   |
| <b>Figure S8.</b> Synthetic scheme for GAS trisaccharide-protein conjugates.....                                                                 | Page S8   |
| <b>Figure S9.</b> MS spectra of $\Delta$ ScpA <sup>H193A</sup> and GAS trisaccharide- $\Delta$ ScpA <sup>H193A</sup><br>Conjugate <b>2</b> ..... | Page S8   |
| <b>Figure S10.</b> MS spectra of BSA and GAS trisaccharide-BSA<br>conjugate <b>3</b> .....                                                       | Page S9   |
| <b>Table S2.</b> The carbohydrate loading of GAS trisaccharide-protein conjugates.....                                                           | Page S9   |

## I. The primers designed for site-directed mutagenesis

**Table S1.** The primers designed for site-directed mutagenesis

| Entry | Mutational site | primers                                                      |
|-------|-----------------|--------------------------------------------------------------|
| 1     | D130A           | forward 5'TGTTGTTGCAGTGATTG <u>C</u> TGCTGGTTTTGA3'          |
|       |                 | reverse 3'CTCGACCCTGACAACAACGTCAC <u>T</u> AACGAC5'          |
| 2     | S512A           | forward 5'CAAAC <u>T</u> TTCTGGAACTGCTATGTCTGCGCC3'          |
|       |                 | reverse 3'TGTTCATAACGGTTTGAAAGACCTTGAC <u>G</u> AT5'         |
| 3     | H193A           | forward 5' GCTGT <u>C</u> GATCAAGAGG <u>C</u> CGGCACACACG 3' |
|       |                 | reverse 3'TACCATTTTGGCGACAGCTAGTTCTC <u>C</u> GGC 5'         |
| 4     | N295A           | forward 5' AATATGAGCTTTGGT <u>G</u> CTGCTGCACTAGCTT3'        |
|       |                 | reverse 3'TCGATTCCACTAATTATACTCGAAACCA <u>C</u> GACG5'       |

## II. MALDI-TOF MS results for the hydrolysis of human C5a peptide by various $\Delta$ ScpA

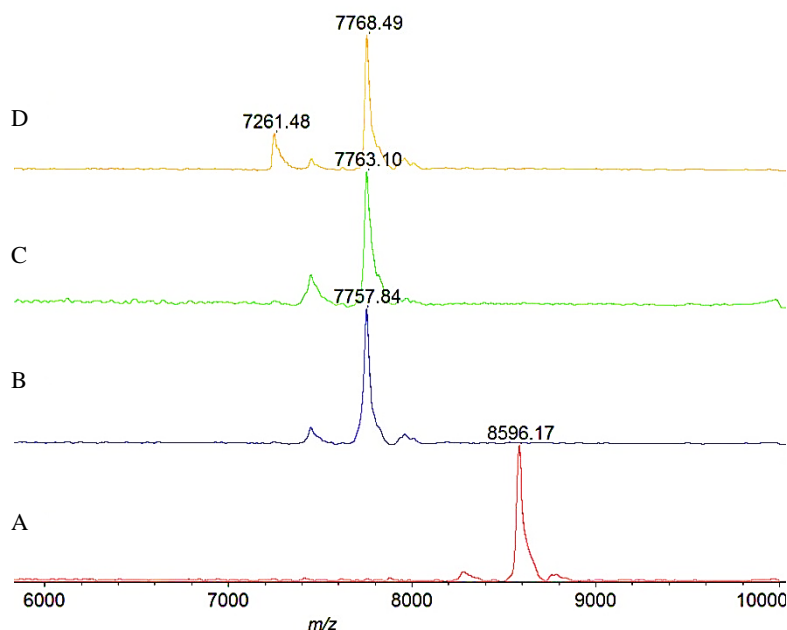

**Figure S1.** MALDI-TOF MS results for (A) human C5a peptide and for the hydrolysis of human C5a peptide (30  $\mu\text{g/mL}$ ) in the presence of truncated wild-type  $\Delta$ ScpA (B) 1  $\mu\text{g/mL}$ , (C) 3  $\mu\text{g/mL}$  and (D) 30  $\mu\text{g/mL}$  at 20  $^{\circ}\text{C}$  for 30 min.

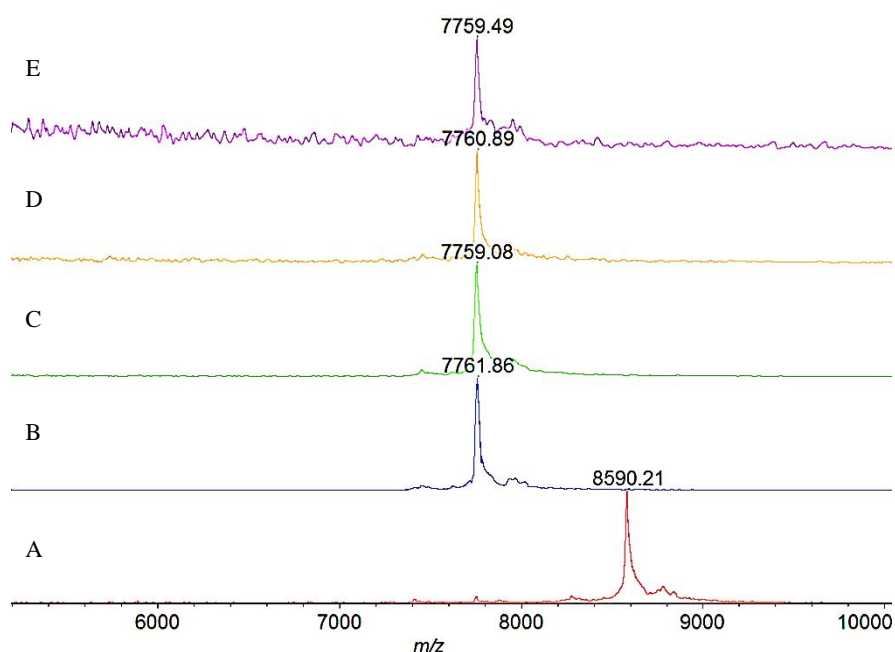

**Figure S2.** MALDI-TOF MS results for (A) human C5a peptide and for the hydrolysis of human C5a peptide (30  $\mu\text{g/mL}$ ) in the presence of  $\Delta$ ScpA<sup>D130A</sup> (B) 1  $\mu\text{g/mL}$ , (C) 3  $\mu\text{g/mL}$ , (D) 30  $\mu\text{g/mL}$  and (E) 300  $\mu\text{g/mL}$  at 20  $^{\circ}\text{C}$  for 30 min.

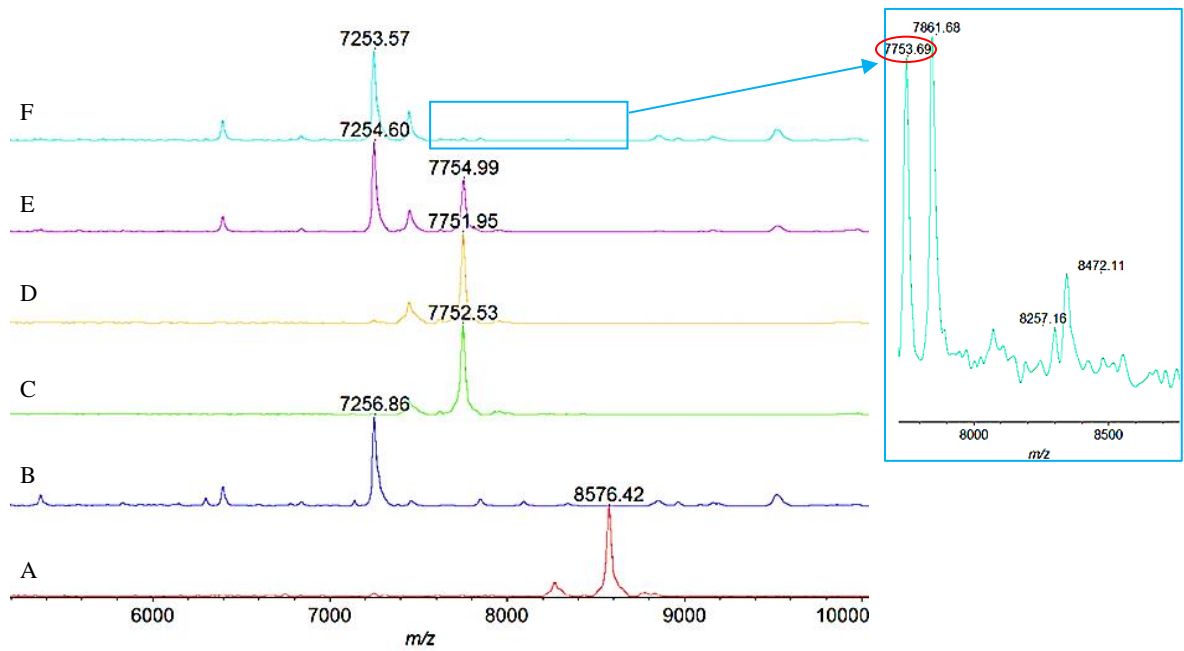

**Figure S3.** MALDI-TOF MS results for (A) human C5a peptide, (B)  $\Delta\text{ScpA}^{\text{N295A}}$ , and for the hydrolysis of human C5a peptide (30  $\mu\text{g/mL}$ ) in the presence of  $\Delta\text{ScpA}^{\text{N295A}}$  (C) 1  $\mu\text{g/mL}$ , (D) 3  $\mu\text{g/mL}$ , (E) 30  $\mu\text{g/mL}$  and (F) 300  $\mu\text{g/mL}$  at 20 °C for 30 min.

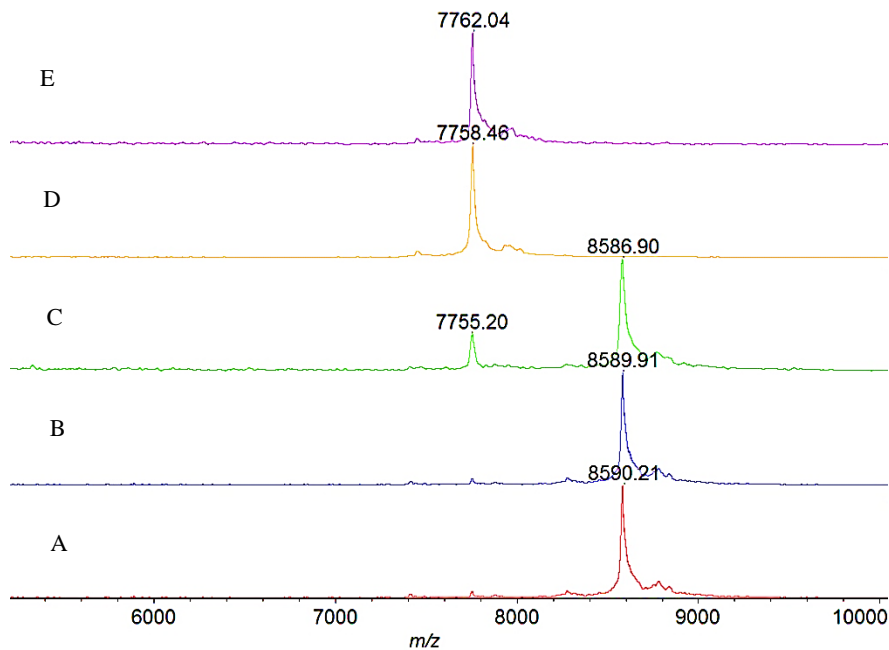

**Figure S4.** MALDI-TOF MS results for (A) human C5a peptide and for the hydrolysis of human C5a peptide (30  $\mu\text{g/mL}$ ) in the presence of  $\Delta\text{ScpA}^{\text{S512A}}$  (B) 1  $\mu\text{g/mL}$ , (C) 3  $\mu\text{g/mL}$ , (D) 30  $\mu\text{g/mL}$  and (E) 300  $\mu\text{g/mL}$  at 20 °C for 30 min.

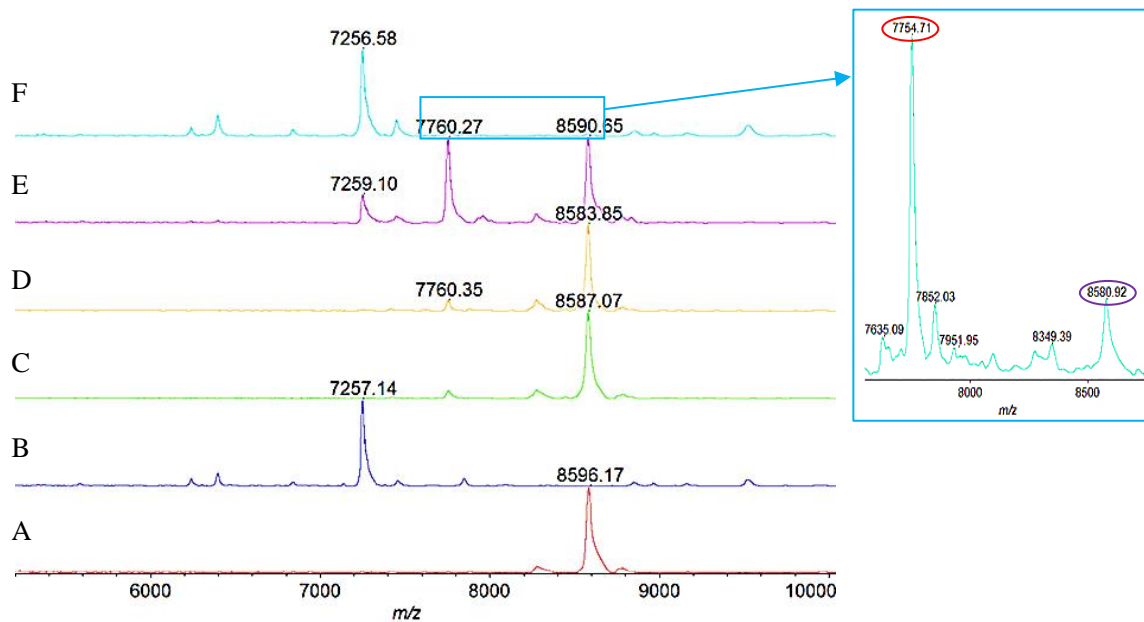

**Figure S5.** MALDI-TOF MS results for (A) human C5a peptide, (B)  $\Delta\text{ScpA}^{\text{D130S, S512A}}$ , and for the hydrolysis of human C5a peptide (30  $\mu\text{g/mL}$ ) in the presence of  $\Delta\text{ScpA}^{\text{D130S, S512A}}$  (C) 1  $\mu\text{g/mL}$ , (D) 3  $\mu\text{g/mL}$ , (E) 30  $\mu\text{g/mL}$  and (F) 300  $\mu\text{g/mL}$  at 20  $^{\circ}\text{C}$  for 30 min.

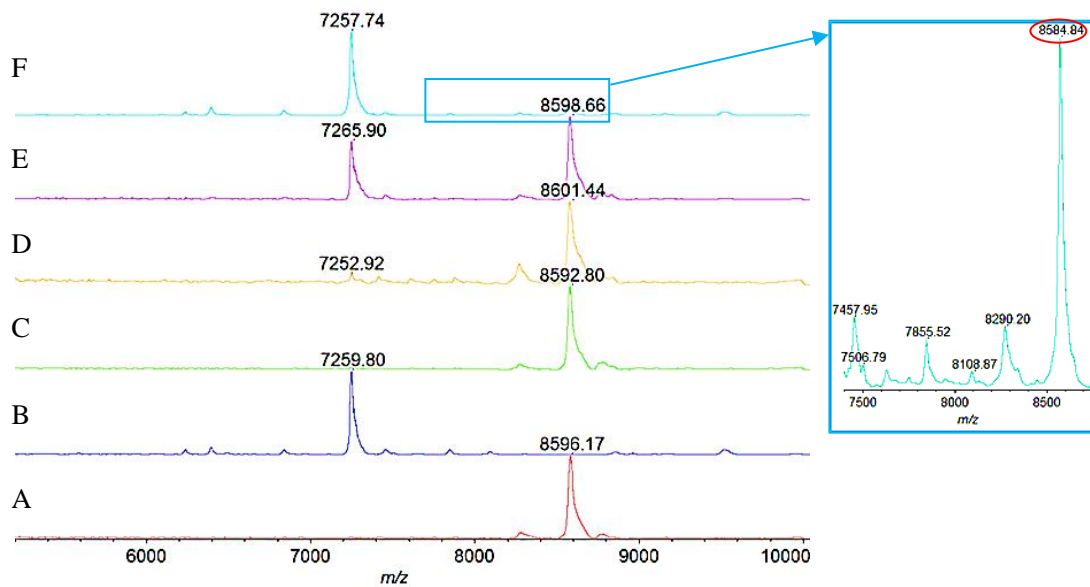

**Figure S6.** MALDI-TOF MS results for (A) human C5a peptide, (B)  $\Delta\text{ScpA}^{\text{H193A}}$ , and for the hydrolysis of human C5a peptide (30  $\mu\text{g/mL}$ ) in the presence of  $\Delta\text{ScpA}^{\text{H193A}}$  (C) 1  $\mu\text{g/mL}$ , (D) 3  $\mu\text{g/mL}$ , (E) 30  $\mu\text{g/mL}$  and (F) 300  $\mu\text{g/mL}$  at 20  $^{\circ}\text{C}$  for 30 min.

### III. Characterization of GAS trisaccharide hapten 1

**A**

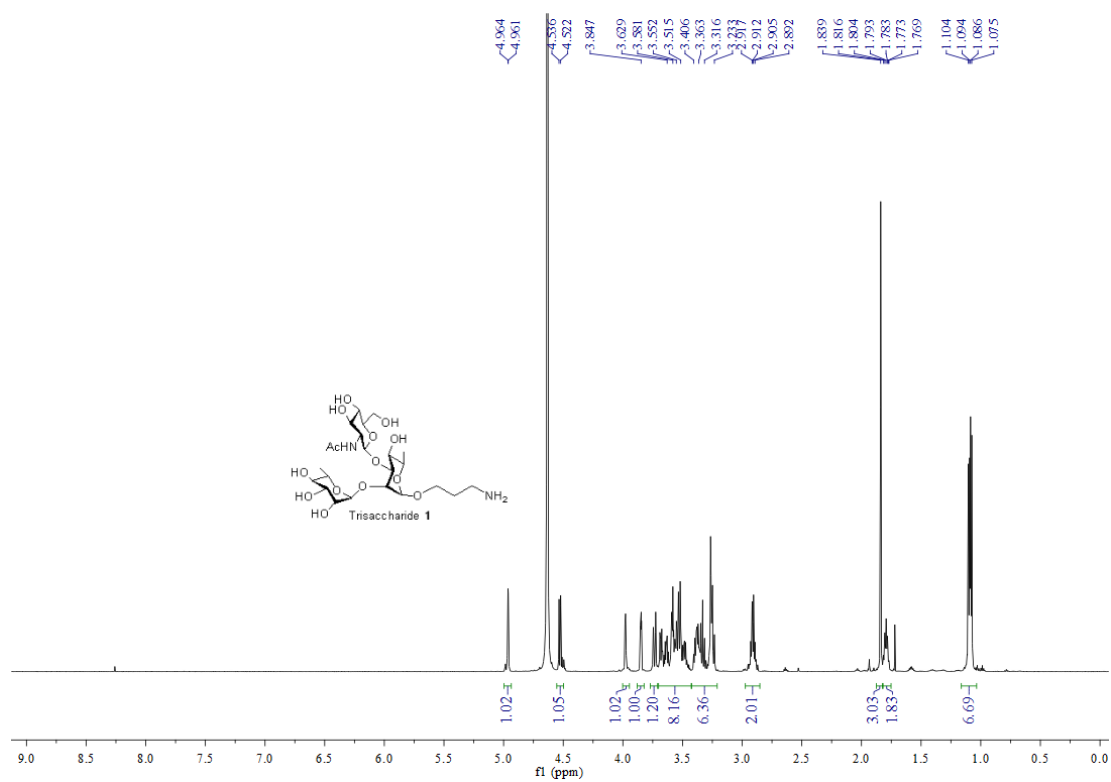

**B**

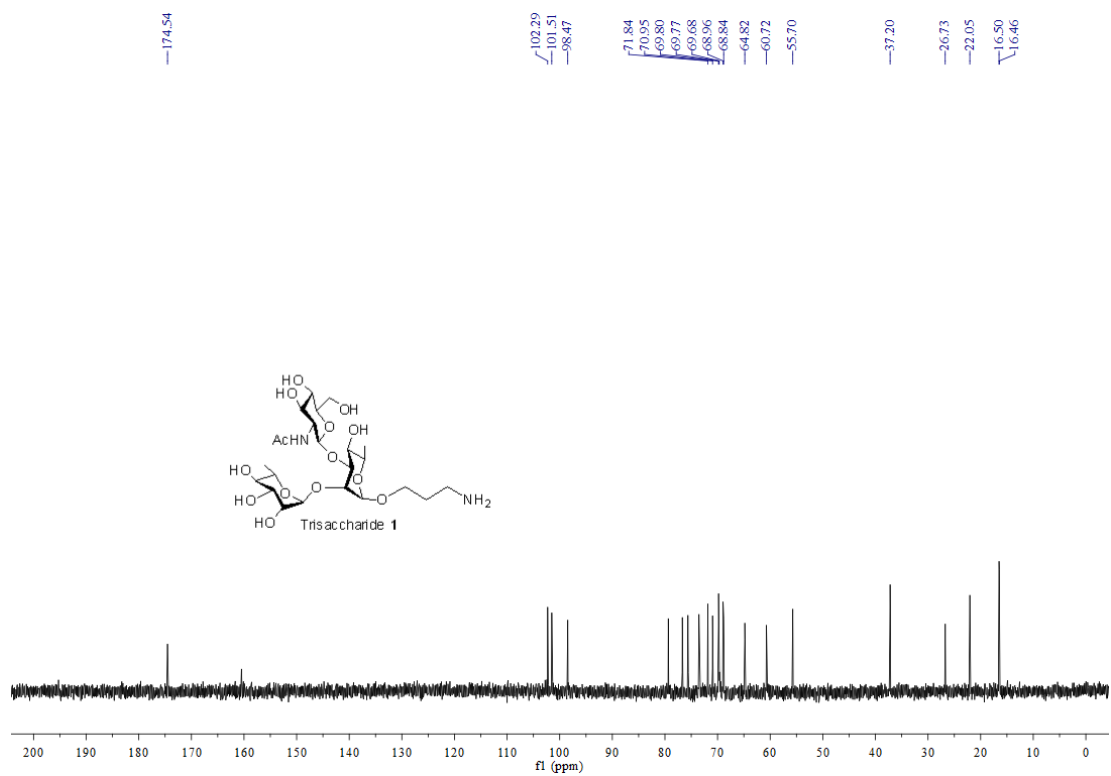

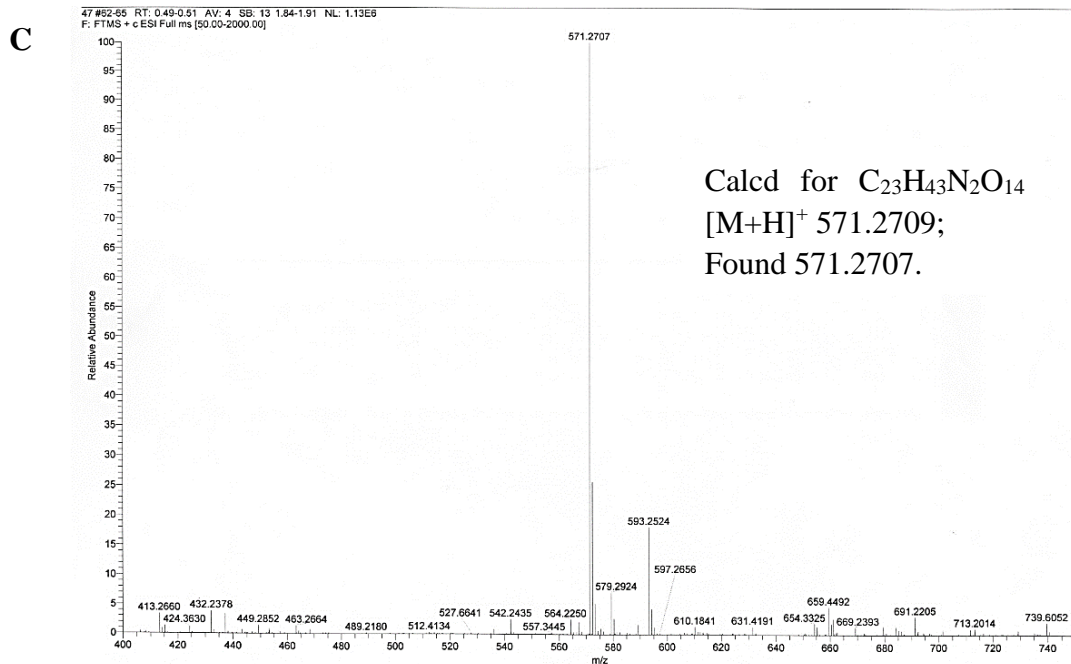

**Figure S7.** NMR and MS spectra of GAS trisaccharide **1**: (A)  $^1\text{H}$ -NMR (600 MHz,  $\text{D}_2\text{O}$ ), (B)  $^{13}\text{C}$ -NMR (150 MHz,  $\text{D}_2\text{O}$ ), and (C) ESI-TOF HRMS (positive).

#### IV. Preparation and characterization of the GAS trisaccharide-protein conjugates

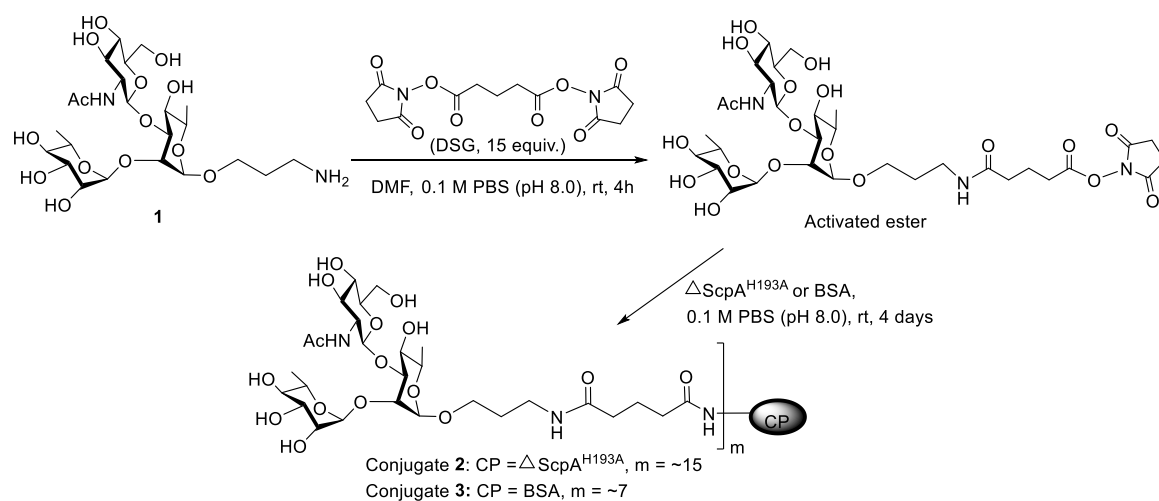

**Figure S8.** Synthetic scheme for GAS trisaccharide-protein conjugates.

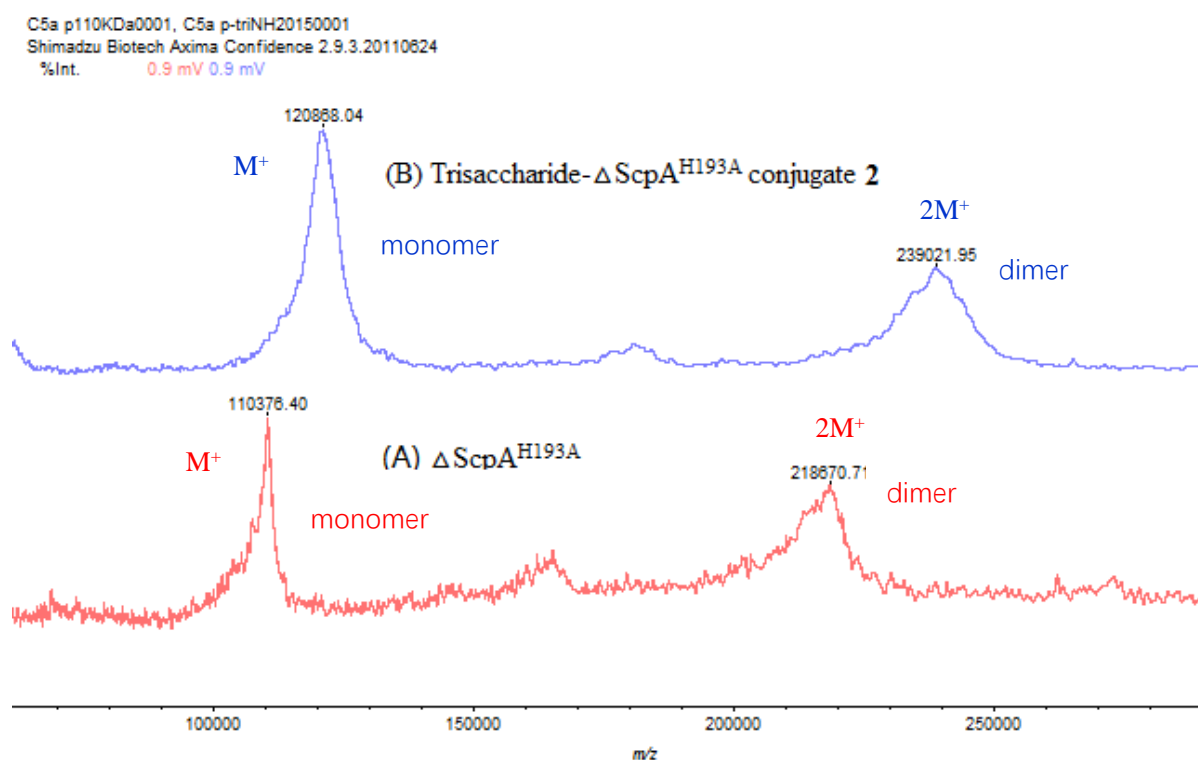

**Figure S9.** MALDI-TOF MS results for (A)  $\Delta\text{ScpA}^{\text{H193A}}$  and (B) trisaccharide- $\Delta\text{ScpA}^{\text{H193A}}$  conjugate 2



BSA0002, BSA-trisacchride0001  
 Shimadzu Biotech Axima Confidence 2.9.3.20110624  
 %Int. 7.2 mV 2.4 mV

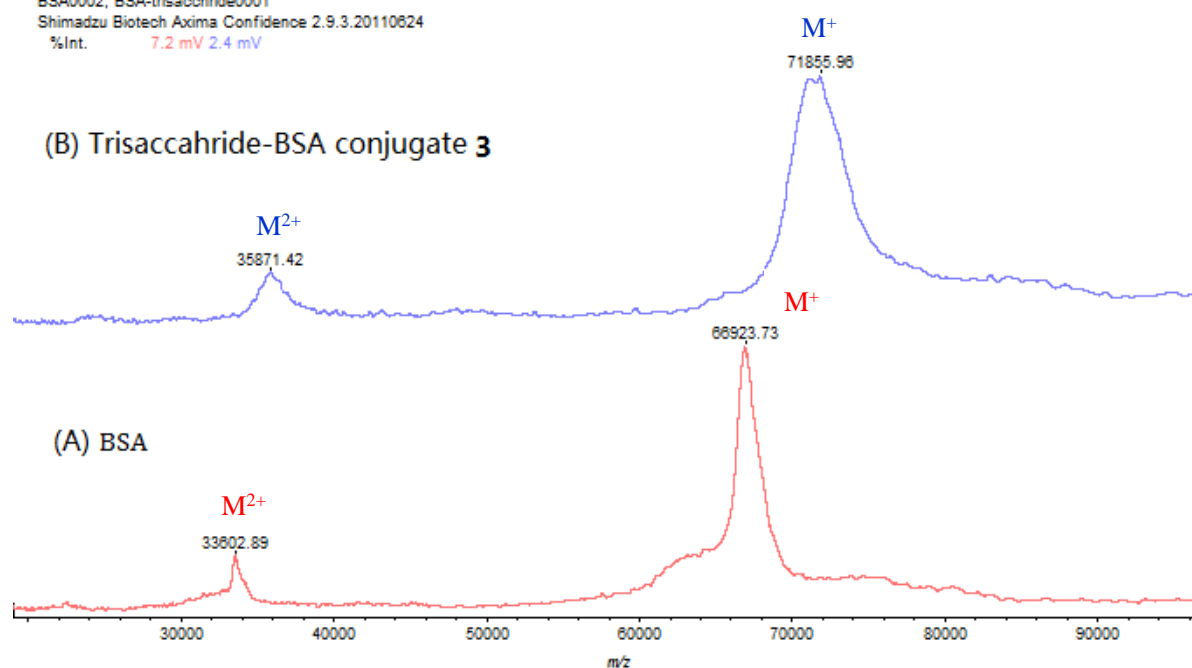

**Figure S10.** MALDI-TOF MS results for (A) BSA and (B) and trisaccharide-BSA conjugate 3

**Table S2.** The carbohydrate loading of GAS trisaccharide-protein conjugates

| Neoglycoprotein | Carrier Protein (CP)           | Hapten residues/ protein molecule (m) | Carbohydrate loading (%) |
|-----------------|--------------------------------|---------------------------------------|--------------------------|
| 2               | $\Delta$ ScpA <sup>H193A</sup> | 15                                    | 8.7                      |
| 3               | BSA                            | 7                                     | 6.8                      |
